# Supplementary material
Source: MDPI journal article supplement (https://www.mdpi.com/2073-4395/13/3/921)
Supplement: s1 [file s1]

## Supporting information

# Properties of Biochar Obtained from Tropical Crop Wastes Under Different Pyrolysis Temperatures and Its Application on Acidic Soil

Shuhui Song <sup>1,2,†</sup>, Ping Cong <sup>3,†</sup>, Chao Wang <sup>2</sup>, Puwang Li <sup>2,\*</sup>, Siru Liu <sup>2</sup>, Zuyu He <sup>2</sup>, Chuang Zhou <sup>2</sup>, Yunhao Liu <sup>2</sup> and Ziming Yang <sup>2,\*</sup>

<sup>1</sup> The College of Natural Resources and Environment, South China Agricultural University, Guangzhou 510642, China

<sup>2</sup> Key Laboratory of Tropical Crops Nutrition of Hainan province, South Subtropical Crop Research Institute, Chinese Academy of Tropical Agricultural Sciences, Zhanjiang 524091, China

<sup>3</sup> Key Laboratory of Tobacco Biology and Processing, Ministry of Agriculture and Rural Affairs, Tobacco Research Institute of Chinese Academy of Agricultural Sciences, Qingdao 266101, China

\* Correspondence: puwangli@163.com (P.L.); yangziming2004@163.com (Z.Y.)

† These authors contributed equally to this work.

- **Table S1** Inorganic elemental contents of biochar prepared at different temperatures
- **Figure S1** Distribution of pores. PALB300, PALB500, PALB700: biochar from pineapple leaves at 300 °C , 500 °C, 700 °C, respectively. BASB300, BASB500, BASB700: biochar from banana stems at 300 °C, 500 °C, 700 °C, respectively; SCBB300, SCBB500, SCBB700: biochar from sugarcane bagasse at 300 °C, 500 °C, 700 °C, respectively. HCSB300, HCSB500, HCSB700: biochar from horticultural substrate at 300 °C, 500 °C, 700 °C, respectively. The same below.

**Table S1.** Inorganic elemental contents of biochar prepared at different temperatures.

|         | P          | S           | Mg         | Ca          | Fe         | Al          |
|---------|------------|-------------|------------|-------------|------------|-------------|
| PALB300 | 0.21±0.01h | 0.40±0.08e  | 0.40±0.01g | 0.62±0.03gh | 0.36±0.01f | 0.32±0.01h  |
| PALB500 | 0.24±0.01g | 0.27±0.01f  | 0.43±0.01g | 0.67±0.03g  | 0.37±0.01f | 0.38±0.01fg |
| PALB700 | 0.25±0.01g | 0.25±0.01fg | 0.55±0.02f | 0.84±0.04g  | 0.45±0.01d | 0.53±0.01e  |
| BASB300 | 0.54±0.01f | 0.50±0.01d  | 1.83±0.06c | 1.56±0.07f  | 0.10±0.01j | 0.03±0.01k  |
| BASB500 | 0.74±0.01e | 0.53±0.07d  | 2.77±0.09b | 2.62±0.12e  | 0.29±0.01g | 0.39±0.01f  |
| BASB700 | 0.98±0.01d | 0.43±0.01e  | 4.01±0.13a | 3.61±0.17d  | 0.38±0.01e | 0.88±0.02d  |
| SCBB300 | 0.16±0.01i | 0.21±0.02g  | 0.08±0.01h | 0.18±0.01i  | 0.16±0.01i | 0.12±0.01j  |
| SCBB500 | 0.20±0.01h | 0.13±0.01h  | 0.13±0.01h | 0.30±0.01hi | 0.28±0.01g | 0.36±0.01g  |
| SCBB700 | 0.17±0.01i | 0.13±0.01h  | 0.11±0.01h | 0.25±0.01i  | 0.20±0.01h | 0.21±0.01i  |
| HCSB300 | 1.17±0.01c | 0.68±0.01c  | 0.87±0.03e | 6.63±0.34c  | 1.51±0.02c | 0.94±0.02c  |
| HCSB500 | 1.52±0.01a | 0.86±0.02a  | 1.21±0.04d | 8.63±0.40b  | 1.63±0.02b | 1.44±0.02b  |
| HCSB700 | 1.35±0.01b | 0.77±0.01b  | 1.26±0.04d | 9.20±0.43a  | 1.71±0.02a | 1.76±0.03a  |

PALB300, PALB500, PALB700: biochar from pineapple leaves at 300 °C , 500 °C, 700 °C, respectively; BASB300, BASB500, BASB700: biochar from banana stems at 300 °C, 500 °C, 700 °C, respectively; SCBB300, SCBB500, SCBB700: biochar from sugarcane bagasse at 300 °C, 500 °C, 700 °C, respectively. HCSB300,HCSB500, HCSB700: biochar from horticultural substrate at 300 °C, 500 °C, 700 °C, respectively. The same below.

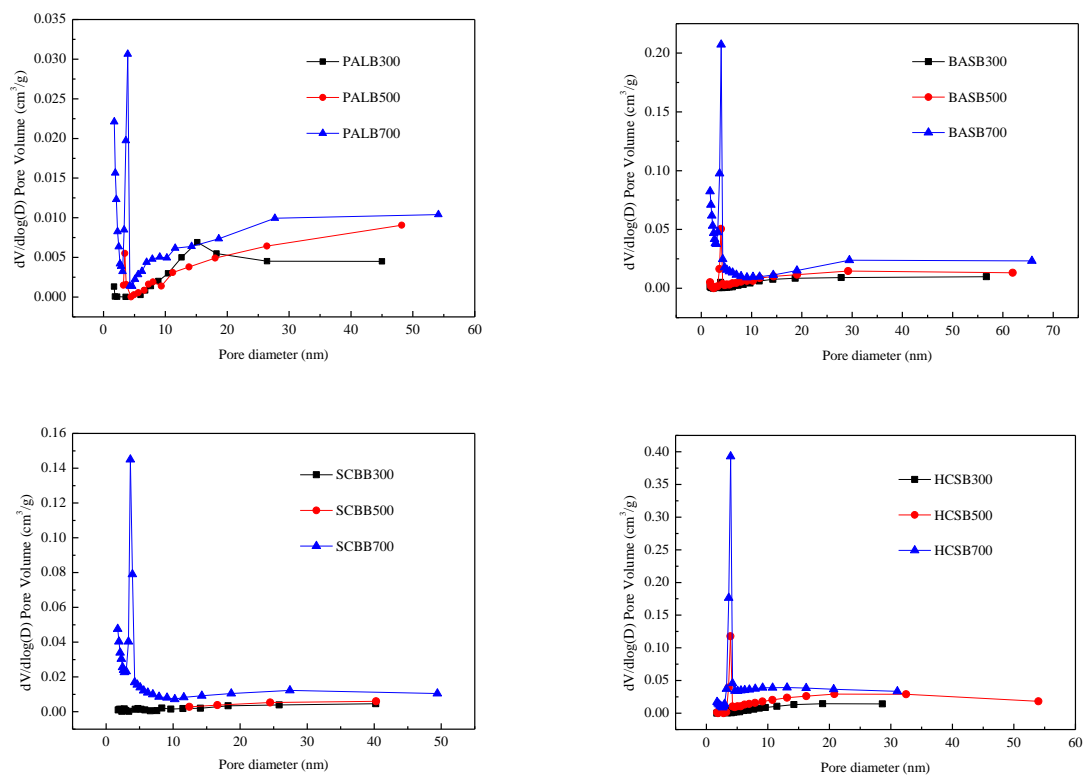

Figure S1. Distribution of pores.
